# Supplementary material for: Using an Ionic Liquid to Reduce the Electrical Percolation Threshold in Biobased Thermoplastic Polyurethane/Graphene Nanocomposites
Source: PubMed Central journal article supplement (PMC6473422; doi:10.3390/polym11030435), 2019-03-06
Supplement: polymers-11-00435-s001.pdf [file polymers-11-00435-s001.pdf]

**Table S1.** Young's modulus of the bTPU/IL blends.

| <b>COMPOSITION</b> | <b>YOUNG'S MODULUS (MPa)</b><br><b>(<math>\pm 10</math> MPa)</b> |
|--------------------|------------------------------------------------------------------|
| bTPU               | 460                                                              |
| bTPU-1 IL          | 460                                                              |
| bTPU-2 IL          | 450                                                              |
| bTPU-3 IL          | 440                                                              |
